# Supplementary material for: The effects of workplace stressors on muscle activity in the neck-shoulder and forearm muscles during computer work: a systematic review and meta-analysis
Source: Springer Nature journal article supplement (doi:10.1007/s00421-013-2602-2), 2013-03-04
Supplement: MOESM2 [file 8484556]

**The effects of workplace stressors on muscle activity in the neck-shoulder and forearm muscles during computer work: a systematic review and meta-analysis.** Eur J App Physio. B.H.W. Eijkelhof, M.A. Huysmans, J.L. Bruno Garza, B.M. Blatter, J.H. van Dieën, J.T. Dennerlein, A.J. van der Beek.

Corresponding Author: Dr. M.A. Huysmans, E mail: [m.huysmans@vumc.nl](mailto:m.huysmans@vumc.nl), a) Department of Public and Occupational Health and the EMGO Institute for Health and Care Research, VU University Medical Center, Van der Boechorststraat 7, 1081 BT, Amsterdam, The Netherlands, b) Body@Work Research Center on Physical Activity, Work and Health, TNO-VU/VUmc, Amsterdam, The Netherlands.

**Online Resource 2** Data extraction table with characteristics of studies ( $n = 28$ ) included in this review

| Study                        | Study population       |                              | Study design | Control condition | Intervention                                                        | Wash-out period                                                                                             |                | Measured muscles | Meta-analysis                                 |                      |                                  |                                                                                          |                   |
|------------------------------|------------------------|------------------------------|--------------|-------------------|---------------------------------------------------------------------|-------------------------------------------------------------------------------------------------------------|----------------|------------------|-----------------------------------------------|----------------------|----------------------------------|------------------------------------------------------------------------------------------|-------------------|
|                              | Number of participants | Characteristics              |              |                   |                                                                     | Task                                                                                                        | Added stressor |                  | Time between control and intervention session | Duration of sessions | Forearm, neck-shoulder           | Inclusion                                                                                | Subgroup category |
| <b>Alkjaer et al. 2005</b>   | 28F                    | experienced computer workers | lab          | exp CO            | mouse clicks at predefined pace                                     | CWT, answer as quickly and correctly as possible (same predefined cue rate as in CON), performance feedback | 30 min         | 30 min           | ED, FCR TRAP, NECK                            | Y                    | cognitive load                   | DMV: Y<br>clicking frequency<br><br>number of correct answers: Y<br><br>response time: Y | N                 |
| Blangsted et al. 2003**      | 24F                    |                              | field        | obs               | participants' own computer work                                     | Realistic time pressure and work load                                                                       | NA             | NA               | EDC TRAP                                      | N                    | NA                               | NA                                                                                       | NA                |
| <b>Blangsted et al. 2004</b> | 12F                    | experienced computer workers | lab          | exp CO            | keying numbers with dominant hand on numerical part of the keyboard | MT, lack of support, surveillance of worker                                                                 | 8 min          | 12 min           | TRAP                                          | Y                    | cognitive load, emotional stress | DMV: N<br><br>number of errors: N                                                        | Y                 |

|                                                |         |                                                       |     |        |                                                                                                                   |                                                                                               |                                          |                           |                                |                |                  |                                                    |     |
|------------------------------------------------|---------|-------------------------------------------------------|-----|--------|-------------------------------------------------------------------------------------------------------------------|-----------------------------------------------------------------------------------------------|------------------------------------------|---------------------------|--------------------------------|----------------|------------------|----------------------------------------------------|-----|
| Bloemsaat et al. 2005                          | 9F, 5M  | mean age 26, experienced computer workers             | lab | exp CO | perform rapid tapping movements with dominant index finger                                                        | 1.MT<br>2.increased tapping rate                                                              | 1. 1 min<br>2. no pause                  | 1. ±9 min<br>2. ±4,5 min  | ED, ECR, ECU, FDS TRAP         | N missing data | NA               | 1: DMV: N predefined<br>2: DMV: N (= intervention) | NA  |
| <b>Ekberg et al. 1995 (pilot)</b>              | 10M     | mean age 25 (20-34), students                         | lab | exp CO | data entry task on numerical part of the keyboard with dominant hand; self-selected pace, as correct as possible  | 1.MA, as quick and correct as possible<br>2.CWT, at predetermined pace as correct as possible | 40 sec                                   | 80 sec                    | TRAP                           | 1. Y           | 1.cognitive load | 1. DMV: Y                                          | 1.N |
| <b>Ekberg et al. 1995 (main)</b>               | 20F     | mean age 36 (19-56), professional computer workers    | lab | exp CO | data entry task on numerical part of the keyboard with dominant hand; self-selected pace, as correct as possible  | MA, as quick and correct as possible                                                          | different part of the day (morning-noon) | 1 hour                    | TRAP                           | Y              | cognitive load   | DMV: Y                                             | N   |
| <b>Finsen et al. 2001; Finsen et al. 2001*</b> | 9F      | mean age 25 (20-35), regular computer users, students | lab | exp CO | mouse task with right hand, typing numbers on numerical part of the keyboard with left index finger, avoid errors | MT                                                                                            | ?                                        | CON: 7 min<br>EXP: 1 hour | EDC, ECR, FDS                  | Y              | cognitive load   | DMV: N predetermined<br>number of errors: Y        | Y   |
| Gerard et al. 2002                             | 16F, 2M | mean age 34 (22-57), experienced 10-finger typists    | lab | exp CO | copy typing with two hands, self paced                                                                            | increased typing speed, 100% max                                                              | at least a day                           | 30 min                    | Finger extensor, Finger flexor | N missing data | NA               | DMV: N (= intervention)                            | NA  |

|                                                  |        |                                                                                           |     |        |                                                                                                       |                                                                                                                 |                                                                           |                                             |                         |                                                                                                    |                                 |                                                            |              |
|--------------------------------------------------|--------|-------------------------------------------------------------------------------------------|-----|--------|-------------------------------------------------------------------------------------------------------|-----------------------------------------------------------------------------------------------------------------|---------------------------------------------------------------------------|---------------------------------------------|-------------------------|----------------------------------------------------------------------------------------------------|---------------------------------|------------------------------------------------------------|--------------|
| <b>Hughes et al. 2007</b>                        | 9F, 9M | mean age 25,4 (± 6,4), 10-finger touch typists, students                                  | lab | exp CO | copy typing, errors no issue                                                                          | 1.verbal MA<br>2.increased typing speed                                                                         | 3 min                                                                     | 5 min                                       | ECU, FCU                | 1.Y<br>2. Y                                                                                        | 1.cognitive load<br>2.work pace | 1. DMV: Y<br>2. DMV: N (=intervention)<br>typing errors: Y | 1.N<br>2.NA  |
| Johnston et al. 2008                             | 55F    | 33 working, 22 non-working, competent typists                                             | lab | exp    | copytyping at comfortable pace                                                                        | type as fast and accurately as possible with superimposed stress (surveillance of worker, performance feedback) | a few minutes (or long enough for heart rate to return to baseline level) | 5 min                                       | TRAP, CES               | N<br>not possible to extract data accurately from the presented figure                             | NA                              | DMV: Y<br>error rate: Y                                    | NA           |
| Kristiansen et al. 2009                          | 10F    | mean age 34,7 (25-51), experienced computer workers                                       | lab | exp CO | 1.mouse work<br><br>2.order judgment task, answer by key press with index finger of the dominant hand | simulated office noise                                                                                          | 12 min                                                                    | 20 min (task 1+2 together; 10 min per task) | TRAP                    | 1.N<br>no valid intervention for our comparison<br>2.N<br>no valid intervention for our comparison | 1.NA<br>2.NA                    | DMV: N<br>response time: N<br>number of errors: N          | 1.NA<br>2.NA |
| <b>Laursen et al. 2000; Laursen et al. 2001*</b> | 17F    | mean age young group: 25 (22-28), elderly group: 63 (56-70), experienced computer workers | lab | exp CO | mouse tasks at predefined speed                                                                       | reduced target size                                                                                             | 1 hour (10 min break, 50 min performing mouse work)                       | 100 sec                                     | ECR, FCR, ED TRAP, NECK | Y                                                                                                  | precision                       | DMV: N<br>predefined speed,<br>error rate: Y               | NA           |

|                                 |          |                                                                                             |     |        |                                                                                      |                                                                                                                        |        |         |                              |                                            |                                 |                                                                                   |                                               |
|---------------------------------|----------|---------------------------------------------------------------------------------------------|-----|--------|--------------------------------------------------------------------------------------|------------------------------------------------------------------------------------------------------------------------|--------|---------|------------------------------|--------------------------------------------|---------------------------------|-----------------------------------------------------------------------------------|-----------------------------------------------|
| <b>Laursen et al. 2002</b>      | 12F      | mean age 32 (27-41), experienced computer users                                             | lab | exp CO | key presses and mouse clicks, predefined reaction time                               | CWT, as quickly (within same reaction time as in control condition) and as correctly as possible, performance feedback | 2 min  | 8 min   | ECR, ED, ECU, FCU TRAP, NECK | Y                                          | cognitive load                  | DMV: N                                                                            | Y                                             |
| Leyman et al. 2004              | 4F, 9M   | mean age 33 (22-44), touch typists                                                          | lab | exp CO | copytyping                                                                           | MT                                                                                                                     | 3 min  | ±1 min  | TRAP, CES                    | N missing data                             | NA                              | DMV: N                                                                            | NA                                            |
| <b>McLean and Urquhart 2002</b> | 6F, 4M   | mean age 23 (± 2), experienced computer users                                               | lab | exp CO | 1.copytyping at comfortable pace                                                     | 1.1 maximal typing speed                                                                                               | 30 min | 30 min  | TRAP                         | Y                                          | 1.1 work pace                   | 1.1. DMV: N (= intervention)                                                      | 1.1.NA                                        |
|                                 |          |                                                                                             |     |        |                                                                                      | 1.2.maximal typing speed, environmental distraction, surveillance of worker, performance feedback                      |        |         |                              |                                            | 1.2 work pace, emotional stress | 1.2. DMV: N (= part of intervention), but lower than in first intervention (1.1.) | 1.2. N no individual stressor as intervention |
|                                 |          |                                                                                             |     |        | 2.copytyping at maximal speed                                                        | 2.environmental distraction, surveillance of worker, performance feedback                                              |        |         |                              |                                            | 2. emotional stress             | 2. DMV: N                                                                         | 2.Y                                           |
| <b>Rietveld et al. 2007</b>     | 20       | mean age 38 (23-49)                                                                         | lab | exp CO | copytyping after relaxation break                                                    | copytyping after superimposed stress                                                                                   | 15 min | 9 min   | ED                           | Y                                          | emotional stress                | DMV: N                                                                            | Y                                             |
| Sandfeld and Jensen 2005        | 17F, 16M | mean age young group: 26,5 (± 2,5), elderly group: 64,9 (± 3,6), experienced computer users | lab | exp CO | mouse pointing task at constant (predefined) clicking frequency, errors are no issue | increased mouse gain across different target sizes                                                                     | 3 min  | 3,5 min | ECR, ED, ECU, FCR TRAP, NECK | N no valid intervention for our comparison | NA                              | DMV: N                                                                            | NA                                            |
|                                 |          |                                                                                             |     |        |                                                                                      |                                                                                                                        |        |         |                              |                                            |                                 | % correct hits: Y                                                                 |                                               |

|                      |        |                                                            |     |        |                                                                                                           |                                                             |       |        |                    |                                       |             |                            |      |
|----------------------|--------|------------------------------------------------------------|-----|--------|-----------------------------------------------------------------------------------------------------------|-------------------------------------------------------------|-------|--------|--------------------|---------------------------------------|-------------|----------------------------|------|
| Schnoz et al. 2000   | 2F, 7M | mean age 29 (± 4)                                          | lab | exp CO | key tapping with index finger of the dominant hand                                                        | increased tapping rate                                      | ?     | 8 sec  | ED, FD TRAP        | N<br>only static EMG values presented | NA          | DMV: N (= intervention)    | NA   |
| Szeto et al. 2005**  | 20F    | mean age 30,4 (22-42), office workers                      | lab | Exp CO | copy typing at normal typing speed, correct typing errors (>10% errors not corrected, program would stop) | Increased typing speed (at least 20%)                       | ?     | 20 min | TRAP, CES          | Y                                     | work pace   | DMV: N (= intervention)    | NA   |
| Szeto and Lin 2011** | 8F     | mean age 26,5 (23-30), experienced typists, office workers | lab | exp CO | mouse tasks<br>1.comfortable clicking speed, precision was set at medium level                            | 1.maximal clicking speed, precision was set at medium level | 3 min | 5 min  | ECU, ECR, FCU, FCR | Y                                     | 1.work pace | 1. DMV: N (= intervention) | 1.NA |
|                      |        |                                                            |     |        |                                                                                                           |                                                             |       |        |                    |                                       | 2.precision | 2. DMV: Y                  | 2.NA |
|                      |        |                                                            |     |        | 2.low level of clicking accuracy, self-selected work pace                                                 | 2.high level of clicking accuracy, self-selected work pace  |       |        |                    |                                       |             |                            |      |

|                      |         |                                         |     |        |                                                                                                                   |                                                                                                                                          |                                  |        |             |                |                                    |                                                                                          |                                                                                                                    |
|----------------------|---------|-----------------------------------------|-----|--------|-------------------------------------------------------------------------------------------------------------------|------------------------------------------------------------------------------------------------------------------------------------------|----------------------------------|--------|-------------|----------------|------------------------------------|------------------------------------------------------------------------------------------|--------------------------------------------------------------------------------------------------------------------|
| Visser et al. 2004   | 6F, 4M  | age 23-58, experienced computer workers | lab | exp CO | mouse tasks: tracking and aiming. low level of clicking accuracy, low mental pressure                             | 1.high level of clicking accuracy                                                                                                        | ?                                | 2 min  | ED, FD TRAP | 1.Y            | 1. precision                       | 1.aiming: DMV: Y error rate: Y<br>tracking: DMV: ? error rate: Y                         | 1.aiming: NA<br>tracking: NA                                                                                       |
|                      |         |                                         |     |        |                                                                                                                   | 2.high mental pressure; perform as: fast ( <i>in aiming task</i> ) correct ( <i>in tracking task</i> ) as possible, performance feedback |                                  |        |             | 2.Y            | 2. emotional, work pace, precision | 2.aiming: DMV: N (= part of intervention) error rate N<br>tracking: DMV: ? error rate: N | 2.aiming: N emotional stress not an individual stressor<br>tracking: N emotional stress not an individual stressor |
|                      |         |                                         |     |        |                                                                                                                   | 3.high level of clicking accuracy, high mental pressure                                                                                  |                                  |        |             | 3.Y            | 3. precision, emotional, work pace | 3.aiming: DMV: N (= intervention) error rate N<br>tracking: DMV: ? error rate: Y         | 3.aiming: N emotional stress not an individual stressor<br>tracking: N emotional stress not an individual stressor |
| Waersted et al. 1991 | 17F, 1M | median age 24 (21-31)                   | lab | exp CO | simple RT, varying response-stimulus interval 1,5-3,5 sec, key presses for answering, respond as fast as possible | complex RT, constant response-stimulus interval 1,5 sec, respond as fast and correctly as possible                                       | ±30 sec (to start the next task) | ±5 min | TRAP        | N missing data | NA                                 | DMV: Y                                                                                   | NA                                                                                                                 |

|                                                   |         |                                                               |     |           |                                                                                                                             |                                                                               |          |        |                       |   |                             |                                                      |                                                  |
|---------------------------------------------------|---------|---------------------------------------------------------------|-----|-----------|-----------------------------------------------------------------------------------------------------------------------------|-------------------------------------------------------------------------------|----------|--------|-----------------------|---|-----------------------------|------------------------------------------------------|--------------------------------------------------|
| <b>Waersted et al. 1994***</b>                    | 13F     | median age 22 (19-30), students                               | lab | exp<br>CO | key presses with right index finger in complex two-choice reaction time task, instructed to work fast and make few mistakes | feedback on speed                                                             | 90 sec   | 6 min  | TRAP                  | Y | Cognitive load              | DMV: N (= part of intervention)<br><br>error rate: Y | Y                                                |
| <b>Wahlström et al. 2002</b>                      | 7F, 8M  | mean age 30 (18-48), experienced computer mouse users         | lab | exp<br>CO | mouse and keyboard work (text editing), 2 pages, no time constraint                                                         | work as fast as possible, 4 pages, time constraint, verbal provocation        | ?        | ?      | ED<br>TRAP            | Y | emotional stress, work pace | DMV: N (= intervention)                              | N<br>emotional stress not an individual stressor |
| <b>Wang et al. 2011</b>                           | 7F, 7M  | mean age 23,2 (± 3), experienced typists, university students | lab | exp<br>CO | copytyping at low speed: 60 Hz                                                                                              | copytyping with increased speed: 180 Hz                                       | no pause | 5 min  | ECR, FCU<br>TRAP, CES | Y | work pace                   | DMV: N (= intervention)                              | NA                                               |
| <b>Westad et al. 2004; Westgaard et al. 2006*</b> | 11F, 9M | age 20-56                                                     | lab | exp<br>CO | copy typing                                                                                                                 | copytyping with 10% increased speed while maintaining or improving error rate | 2 min    | 10 min | TRAP                  | Y | work pace                   | DMV: ?                                               | NA                                               |

\*: data in the two publications concern the same study population and the same experiment and are therefore combined; \*\* subgroup of total study population that is of interest; \*\*\*: experiment 1 included only; F: female; M: male; lab: laboratory; exp: experimental; obs: observational; CO: cross-over design; MT: memory task; MA: mental arithmetic task; CWT: color word test; RT: (two choice) reaction time task; min: minutes; ED: extensor digitorum; ECR: extensor carpi radialis; ECU: extensor carpi ulnaris; EDC: extensor digitorum communis; FCR: flexor carpi radialis; FDS: flexor digitorum superficialis; TRAP: trapezius; NECK: neck extensor muscle group; CES: cervical extensor spinae; DMV: decreased movement velocity; Y: yes; N: no; ?: don't know; NA: not applicable
